# Supplementary material for: Reduction responsive and surface charge switchable polyurethane micelles with acid cleavable crosslinks for intracellular drug delivery
Source: Royal Society of Chemistry journal article supplement (doi:10.1039/c8ra01581c), 2018-01-01
Supplement: c8ra01581c1.pdf [file c8ra01581c1.pdf]

## Supporting Information

### Reduction responsive and surface charge switchable polyurethane micelles with acidity cleavable crosslinks for intracellular drug delivery

Lili Zhao, Chang Liu, Zhuangzhuang Qiao, Yan Yao and Jianbin Luo\*

College of Chemistry and Environmental Protection Engineering, Southwest Minzu University,

610041 Chengdu, China

Tel: +86 28 6902063. Fax: +86 28 85522322

*E-mail addresses:* luojb1971@163.com

#### *Supplemental Figures*

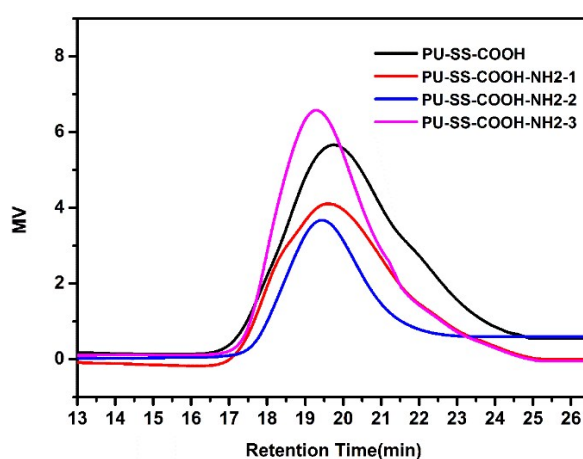

Figure. S1. The GPC curves of PU-SS-COOH, PU-SS-COOH-NH<sub>2</sub>-1, PU-SS-COOH-NH<sub>2</sub>-2 and PU-SS-COOH-NH<sub>2</sub>-3.

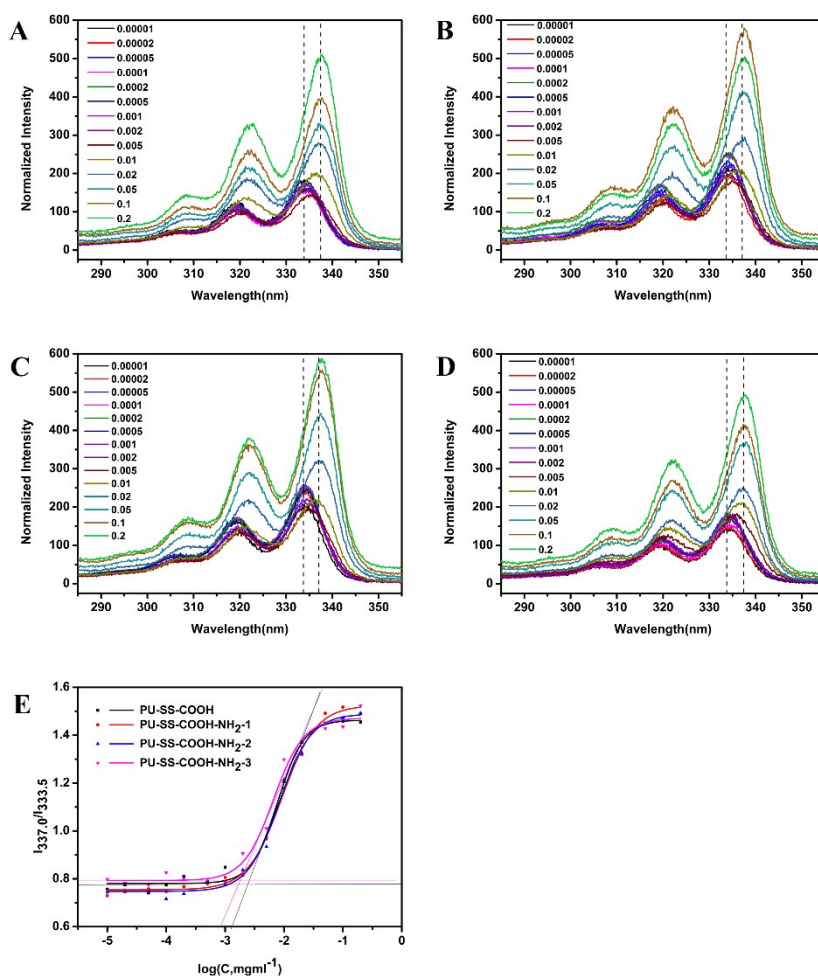

Figure S2. Typical fluorescence excitation spectra (372 nm) of PU-SS-COOH (A), PU-SS-COOH-NH<sub>2</sub>-1 (B), PU-SS-COOH-NH<sub>2</sub>-2 (C) and PU-SS-COOH-NH<sub>2</sub>-3 (D). I<sub>337.0</sub>/I<sub>333.5</sub> ratios in the excitation spectra as a function of micellar concentrations (log C, mg, ml<sup>-1</sup>). The CMC was obtained from the intersection of the two tangent lines shown by the arrows. The CMC of PU-SS-COOH, PU-SS-COOH-NH<sub>2</sub>-1, PU-SS-COOH-NH<sub>2</sub>-2 and PU-SS-COOH-NH<sub>2</sub>-3 was determined to be 2.75×10<sup>-3</sup> mg, ml<sup>-1</sup>, 2.45×10<sup>-3</sup> mg, ml<sup>-1</sup>, 2.4×10<sup>-3</sup> mg, ml<sup>-1</sup> and 2.04×10<sup>-3</sup> mg, ml<sup>-1</sup>. (E)

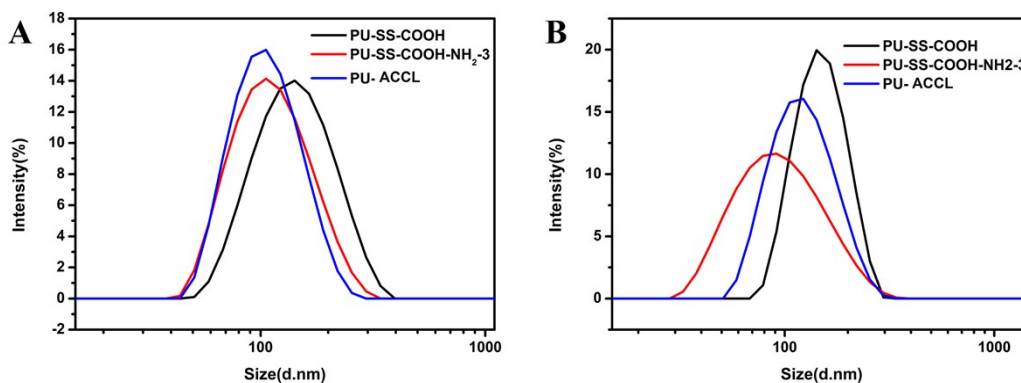

Figure S3. Size distribution of the PU-SS-COOH, PU-SS-COOH-NH<sub>2</sub>-3 and PU-ACCL micelles exist in Na<sub>2</sub>HPO<sub>4</sub> (A) and their PTX loaded micelles (B).

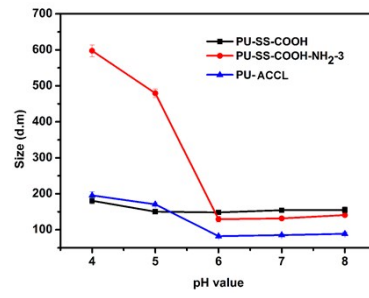

Figure. S4. pH dependent size changing of of PU micelles.

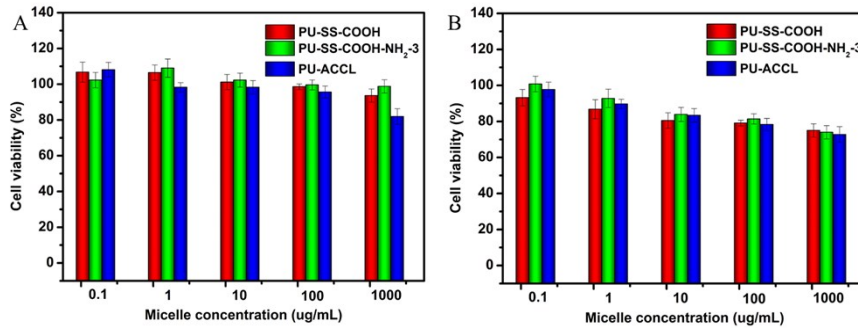

Figure. S5. Viability of HUVECs cells (A) and HepG2 (B) after 48 h of incubation with various concentrations of empty reduction-sensitive polyurethane micelles determined by the CCK8 assay.
